# Supplementary material for: Optimizing Wellness and Student Success. The Umbrella Model
Source: Research Square preprint supplement (doi:10.21203/rs.3.rs-6709430/v1), 2025-06-05
Supplement: Supplementary file 1 [file 69090efa5ad76339aa1c4996.docx]

**Table 1. Scoping Synthesis** **and Findings**

| First Author, Year | Participants | PA Program Phase | Multi-Institutional | Method | Instrumentation | Summary of Findings | Wellness Dimensions |
| --- | --- | --- | --- | --- | --- | --- | --- |
| Allen, 2020(62) | PAS (n = 29); Nursing | Not specified* | No, 1 | Quant | RBWBS | ↑ Psychological WB across students, w/PAS > levels than nursing students; ↑ Benefits debriefing post-IPE simulation (p = .005). | EP, OA, Soc |
| Banning, 2023(60) | PAS (not specified); * Program faculty | Both | Yes, 174 | Not specified* | PAEA reports (MSS, DCS, EOPS) | Graduates’ WB < matriculating students (p < .05): QoL, mental, physical, emotional, and spiritual WB. | EP, IM, Ph, Sp, OWB |
| Buchs, 2024(55) | PAS (n = 17) | Clinical | Yes, 3 | Qual | MBI, PA program websites/materials, PAEA reports (MSS, EOPS), PSS, WBI | 94% early imbalance (pressure, illusory expectation to maintain non-school life.  Insufficient support ≥ 1 or area (burnout, resource access, program personnel & culture, policy).  MH burden (anxiety, depression, SI): New or exacerbated conditions for 88%.  Time and schedule demands (inflexible, inconsistent, non-reciprocal). | EP, IM, OA, Soc, OWB |
| Butaney, 2024(64) | PAS (n = 351) | Didactic | Yes, 6 | Not specified* | CIPS, FFMQ-15, MAPS, SCS, WHO-5 | ↓ Self-compassion & ↑ maladaptive perfectionism were predictors of imposter phenomenon > 50% of the time (p < .001).  WB & mindfulness subconstruct “non-judgement” was the strongest predictor of WB & most prominent in the PAS. | EP, IM, OA, Sp, OWB |
| Filipkowski, 2021(48) | PAS (n = 16); OT, PT, SLP | Didactic | No, 1 | Not specified* | MPS-F, RAND-36 Health Survey, QOLI | ↑ QoL, ↑ MH for perfectionist subconstructs w/ adaptive > maladaptive (p = .003), ↓ Social function for maladaptive below average (p = .026). | IM, Soc, OWB |
| Fortenberry, 2021(65) | PAS (n = 126) | Didactic | Yes, 2 | Not specified* | WBI | Wellness is difficult to implement into pre-existing dense program and curricular structures.  ↑ WB across program, topics, & culture, and tailor for the individual and implement with time conscientiousness. | OA, Sp, Soc, OWB |
| Hoffmann, 2019(71) | PAS (n = 3); Med, MT | Didactic | Yes, 2 | Not specified* | WHOQOL-BREF | Hands-on and online groups: ↑ environmental wellness (p = .02) , Hands-on group: ↑ psychological wellness (p = .03). | EP, OA, Soc, OWB |
| Hong, 2023(63) | PAS (n = 36); Med, Pharm | Didactic | No, 1 | Not specified* | PACT, SATP2C, SPICE-R | Intellectual humility subconstructs 3 of 4: ↑ PAS > Med for open-mindedness (p < .044), intellectual modesty (p = .001), & engagement (p < .001); Female gender ↑ open-mindedness (p = .024) while male gender > intellectual modesty (p = .019);  ↑ age → engagement ↑ (p = .015). | EP, IM, OA, Sp, Soc |
| Hoover, 2022(49) | PAS (n = 294) | Didactic | Yes, 9 | Not specified* | EQ-D, MAAS, PSS, SWLS | Mindfulness subconstructs 3 of 3:↑ Decentering (predictive p = .04), ↑ present attention and awareness, and ↑ psychological flexibility (predictive p < .001) → correlation with ↑ life satisfaction and level of perceived stress (r = .28 to .71). | EP, IM, OA, Sp, Soc, OWB |
| Hoover, 2020(50) | PAS (n = 83) | Didactic | No, 1 | Not specified* | EQ, AAQ-2, PSS, SWLS | ↑ Mindfulness had PV for ↑ life satisfaction (p < .01) and PV for perceived stress when including the participant’s sex (p < .01) . | EP, IM, OA, OWB |
| Hudak, 2024(57) | PAS (n = 635) | Clinical | Yes, Not specified* | Not specified* | PAEA (EOPS, Annual Program Survey) | ↑ Mistreatment reporting for physical (or sexual) behavior (p = .0007) > other types, and for older aged students (p = .04) Policy non-significant predictor of reporting. | EP, OA, Ph, Soc |
| Johnson, Ai. 2020(58) | PAS (n = 320) | Both | Yes, 8 | Not specified* | GAD-7, MBI-SS, PHQ-2 | Burnout subconstructs 2 of 3: Emotional exhaustion predictors - Depression (p < .001), anxiety (p < .001), gender (p = .009), and age (p = .038). Cynicism predictors - Depression (p < .001) and program year (p = .005). | EP, IM, OA, Soc |
| Johnson, Ai. 2020(68) | PAS (n = 320) | Both | Yes, 8 | Not specified* | MBI-SS, CDC-PHDSM | Burnout subconstructs 2 of 3: Prevalence of moderate to high levels of emotional exhaustion (mod. to high) = 79% and cynicism = 56% in the PA students.  QoL: Averaged # of days (out of 30) experiencing poor sleep (16), anxiety (15), depression (7), pain (2); Felt healthy/energized 8 (out of 30) days.  Top student wellness concerns: Pre-DY (finances & nutrition), DY (> 90% students, burnout & stress reduction), CY (empathy & compassion fatigue). | EP, IM, OA, Ph, Soc, OWB |
| Johnson, Au. 2020(70) | PAS (n = 18); Mentors; Pharm, PT | Didactic | No, 1 | Qual | ICF | Experiential learning (IPE) aligned to IPEC core competencies: Themes → learn intersections of professions’ scopes, person’s healthcare experience, whole person care, and improve team efficacy. | IM, OA, Soc, OWB |
| Kilstrom, 2022(61) | PAS (n = 282); Program faculty & staff | Both | Yes, 4 | Not specified* | PAEA Reports (MSS, EOP), UCLA Loneliness Scale | Incongruent perception to experience ratio of faculty & students’ having considered dropping out (~13%:22%) in 6-month span, citing MH (65%) & absent program connection (55%); Other perceptual discrepancies including faculty, staff, & students (counseling use, level of support network).  Drop-out considered in DY (74%) > CY (p < 0.001) & loneliness ratings (75%) ≥ cut-score of 6 (p = 0.003) with half of attritted students (n = 6) leaving for MH reasons. | EP, IM, OA, Soc |
| McWeeney, 2022(56) | PAS (n = 3104) | Clinical | Yes, 142 | Not specified* | PAEA Report (EOPS) | Emotional WB:  Strong correlation with physical WB (r = .762).  → PV based on demographics, debt, URM, & program duration (p < .001).  ↓ scores with male gender (↓ .312”), ↑ age (per 1-year ) (↓ .21), ↑ program debt (↓ .78).  ↓ Physical WB scores: Male gender (↓ .172), ↑ age (by graduation, (↓ .037), ↑ Program duration (↓ .029), ↑ program debt (↓ .95). | EP, OA, Ph |
| Moen, 2024(51) | PAS (n = 39) | Didactic | No, 1 | Not specified* | Actinography, MBI | Burnout subconstructs 3 of 3:  Cynicism → Scores moderate (51%) to high (26%) across majority (n = 30) of students; ↑ at 8 weeks (p = .013); ↑ sleep duration → ↓ cynicism (p = .014); linear correlation + with exhaustion (r = .605, p < .0001) and (-) with professional efficacy (-.444, p = .005).  Emotional exhaustion → Scores moderate (23%) to high (77%) across 100% of students; ↑ sleep duration → ↓ emotional exhaustion (p = .020).  ↑ Sleep duration correlated to a sooner bedtime (r = -0.802, p = < .0001). | EP, OA, Ph |
| Neary, 2023(52) | PAS (n = 157) | Didactic | Yes, 5 | Not specified* | AUDIT-C, OMS-HC-15, PHLMS, RPQ,  SSOSH, UCLA-3 | Race → PV of mindfulness (p = .02), and vulnerability and stigma scores (p = .04).  Age → PV of self-stigma for help seeking (SSOSH) scores (p = .02).  Gender → PV of reflective practice (RPQ) scores (p = .01). | EP, IM, OA, Ph, Soc |
| Neary, 2022(69) | PAS (n = 112) | Didactic | Yes, 5 | Mixed  method | MBI, OMS-HC, PHQ-9, SSOSH | Perceived comfortability ↑ for seeking academic help from faculty (88%) and ↓ for MH issues (58%) at baseline.  ↑ Stigma-related helping-seeking (p = .006) and open-mindedness (p = .002) post-intervention; latter subscales were impacted by social distance (p = .003) and disclosure (p = .02).  3 umbrella themes: Active intervention (curriculum, disclosure, session attendance, tool empowerment, faculty disclosure); Mutuality (vulnerability, power diffusion, empathy as healer); Peer relationship (illusory perception of peers, togetherness). | EP, IM, OA, Ph, Soc |
| Neary, 2021(53) | PAS (n = 175) | Didactic | Yes, 5 | Not specified* | AUDIT-C, OMS-HC-15, PAEA Report (MSS), PHLMS, RPQ, SSOSH | 66% Female gender and 87% non-Hispanic;  97% = Start of DY reported → robust support system; 64% completed > 2,000 + hours’ pre-admissions; 46% Relocated > 50 miles.  35% = Mindfulness practice prior to PA school. No preliminary changes in WB or resiliency. | EP, IM, OA, Ph, Soc |
| Quincy, 2022(59) | PAS (n = 644) | Both | Yes, 266 | Not specified* | Websites: ARC-PA, PA Programs; PAEA Report (APS) | Attrition rate ↑ when biochemistry is required versus nonspecific chemistry course (p = .014). | IM, OA, Soc |
| Sierra, 2022(66) | PAS (n = 2783) | Both | Yes, not specified* | Not specified* | AAPA Student Survey and database, PAEA Reports (MSS, EOPS) | General life satisfaction endorsed by ~85% students.  School satisfaction: DY > CY students  ↑ happiness (~66%) and ↑ enthusiasm about school (p < .001); Burnout (cynicism) CY (68%) > DY students had less educational fulfillment (p < .001).  School stress is 2x > life stress endorsed as high or very high for DY+CY students.  Witnessing and personally experiencing interpersonal toxicity (or abuse) CY > DY occurring at least weekly (p < .001). | EP, IM, OA, Sp, Soc, OWB |
| Sivahop, 2022(54) | PAS (n = 86) | Didactic | No, 1 | Mixed method | CASPA database, MBI-GSS, SMBM | Modifiable factors examined (curricular): Learning environment, grading, assessments, faculty support.  Mutual themes for DY/CY: Motivation, WB, class time, specific course demands, and expectations lacking clarity. | EP, IM, OA, Ph, Soc, OWB |
| Vanderford, 2023(72) | PAS (n = 165); TheaS | Not specified* | No, 1 | Not specified* | Survey name not specified* | Rural students nearly 2x > as likely to agree activity fostered changes in their attitudes and/or beliefs related to MH.  Themes: Empathy, confidence, and positive associations with MH treatment. | EP, IM, OA, Sp, Soc |
| Wardley, 2019(67) | PAS (n = 153) | Both | No, 1 | Not specified* | CPI, PASLES, Visual analog scales | Stress: Academic stress > other (family duties, finances, & relocation) was the greatest source of difference between curricular tracks.  4 Personality Classifications: Alpha, beta, gamma, & delta ; and 20 subconcepts: Social Presence (assertiveness, self-assurance, & self-confidence) ↑ Pedagogy: LBL vs. ↓ PBL (p = .0127) initially changing to PBL pedagogy during DY with later ↑ reports of PBL ↑ confidence when starting rotations.  Learning Environment Dimensions 7 of 7: PBL favored > LBL across 3/7 scales at 1 year – Flexibility (p < .0001), Nurturance (p < .0001), and Meaningful Learning (p < .0001).  LBL: Students’ actual experiences < expectations for 6/7 scales (p < .0001) - Breadth of Interest, Flexibility, Emotional Climate, Nurturance, Meaningful Learning, and Organization.  PBL: Students’ actual experiences > expectations for 2/7 scales – Flexibility (p = .0321) and Student Interaction (p <.0001); Experiences < expectations for Breadth of Learning (p = .0179), Emotional Climate (p < .0001), and Organization (p = .0001). | EP, IM, OA, Sp, Ph, Soc |

**Table 1 Legend:** (ordered from column header left to right and alphabetically)

**Participants:** Med = Medical students, MT = Massage therapy students, OT = Occupational therapy students, PAS = Physician assistant students, Pharm = Pharmacy students, SLP = Speech and language pathology students, TheaS= Theater students

**Method:** Qual = Qualitative, Quant = Quantitative

**Instrumentation/Databases:** AAPA = American Academy of Physician Associates (Assistants),AAQ-2 = Acceptance and Action Questionnaire, APS = Annual Program Survey, AUDIT-C = Alcohol Use Disorder Identification Test Concise, CASPA = The Centralized Application Service for Physician Assistants, CDC-PHDSM = Centers for Disease Control and Prevention Healthy Days Symptoms Module, CIPS = Clance Imposter Phenomenon Scale**,** CPI-7 = California Psychological Inventory, DCS = Didactic Curriculum Survey, EOPS = End of Program Survey, EQ-D = Experiences Questionnaire Decentering Subscale,FFMQ-15 =Five Facet Mindfulness Questionnaire,GAD-7 = Generalized Anxiety Disorder questionnaire,ICF = International Classification of Functioning screening,MAAS = Mindful Attention Awareness Scale,MBI = Maslach Burnout Inventory (-SS = student version), MAPS = Meaning and Purpose Scale, MPS-F **=** Multidimensional Perfectionism Scale - Frost, MSS = Matriculating Student Survey, OMS-HC-15 = Opening Minds Stigma Scale for Health Care Providers, PACT = Performance Assessment Communication and Teamwork, PAEA = PA Education Association, PHLMS = Philadelphia Mindfulness Scale, PSS = Perceived Stress Scale, QOLI = Quality of Life Inventory,RAND-36 = Health-related quality of life survey,RBWBS = Ryff's Psychological Well-Being Scale, RPQ = Reflective Practice Questionnaire, SATP2C = Scales of Attitudes Toward Physician-Pharmacist Collaboration, SCS = Self Compassion Scale, SPICE-R = Student Perceptions of Interprofessional Clinical Education-Revised, SMBM = Shirom-Melamed Burnout Measurement, SSOSH = Self-Stigma of Seeking Help, SWLS = Satisfaction With Life Scale, UCLA-3 = University of California, Los Angelos, WBI = Well-Being Index, WHO-5 = World Health Organization Well-Being Index,WHOQOL-BREF= World Health Organization Quality of Life survey.

**Summary Descriptors:** Grad = Graduate level, LBL = Lecture-based learning, MH = Mental health, PBL = Problem-based learning, PV = Predictive Value, QoL = Quality of life, WB = Well-being, Ugrd = Undergraduate level .↑ = Increased/Higher, ↓ = Decreased/Lower, → = Led to or resulted in.

**Dimensions of Wellness Mapping** (adapted from the NWI framework(37))**:** EP = Emotional/Psychological, IM = Intellectual/Mental, OA = Occupational/Academic, Spi = Spiritual, Ph = Physical, Soc = Social, OWB = Overall Well-being (including generalities of holistic wellness, life satisfaction, or quality of life).

*Not specified in study: Research method and/or mention of sample size (participant or institution). Some sample sizes were obtained from secondary data sources (n = 3,840,(60) n = 169(57)), such as PAEA.(40,73)
