# Supplementary material for: Optimizing Wellness and Student Success. The Umbrella Model
Source: Research Square preprint supplement (doi:10.21203/rs.3.rs-6709430/v1), 2025-06-05
Supplement: Supplementary file 2 [file 76342c564a37941aa2001e7a.docx]

| **Table 2. Directional Constructs and Wellness Dimension Mapping** | | | | | | | | | | | | | | | |
| --- | --- | --- | --- | --- | --- | --- | --- | --- | --- | --- | --- | --- | --- | --- | --- |
|  |  | |  |  | | | |  | |  | |  | | | |  |
| ***Within the Title*** | | | | | | | | | | | | | | | |
|  | | |  | | | | |  | | | | |  | | |  | |
| **Wellness**  **Dimension** | | | **Construct Tone** | | | | | | | |  |  | **Dimension %** | |
|  | | *Positive* | | | |  | | | *Negative* | | |
|  | EP | | 7 | (15.56%) | | | 12 | | | (26.67%) | | | 42.22% | | |
|  |  | |  |  | | |  | | |  | | |  | | |
|  | IM | | 4 | (8.89%) | | | 1 | | | (2.22%) | | | 11.11% | | |
|  |  | |  |  | | |  | | |  | | |  | | |
|  | OA | | 1 | (2.22%) | | | 2 | | | (4.44%) | | | 6.67% | | |
|  |  | |  |  | | |  | | |  | | |  | | |
|  | Ph | | 1 | (2.22%) | | | 0 | | | (0%) | | | 2.22% | | |
|  |  | |  |  | | |  | | |  | | |  | | |
|  | Sp | | 1 | (2.22%) | | | 0 | | | (0%) | | | 2.22% | | |
|  |  | |  |  | | |  | | |  | | |  | | |
|  | Soc | | 3 | (6.67%) | | | 2 | | | (4.44%) | | | 11.11% | | |
|  |  | |  |  | | |  | | |  | | |  | | |
|  | OWB | | 11 | (24.44%) | | | 0 | | | (0%) | | | 24.44% | | |
|  |  | |  |  | | |  | | |  | | |  | | |
|  | **Total Constructs** | | **Total Positive** | | | | **Total Negative** | | | | | | **Total % of Dimensions** | | |
|  | 45 | | 28 | (62.22%) | | | 17 | | | (37.78%) | | | 100.00% | | |
|  |  | |  |  | | | |  | |  | |
| ***Within the Study*** | | | | |  | | | | | | | | | | |
|  | | |  | | | | |  | | | | |  | | |  | |
| **Wellness**  **Dimension** | | | **Construct Tone** | | | | | | | | | | **Dimension %** | | |
| *Positive* | | |  | | *Negative* | | | |
|  | EP | | 38 | (13.52%) | | | | 52 | | (18.51%) | | 32.03% | |  | |
|  |  | |  |  | | | |  | |  | |  | |  | |
|  | IM | | 36 | (12.81%) | | | | 22 | | (7.83%) | | 20.64% | |  | |
|  |  | |  |  | | | |  | |  | |  | |  | |
|  | OA | | 24 | (8.54%) | | | | 27 | | (9.61%) | | 18.15% | |  | |
|  |  | |  |  | | | |  | |  | |  | |  | |
|  | Ph | | 10 | (3.56%) | | | | 25 | | (8.90%) | | 12.46% | |  | |
|  |  | |  |  | | | |  | |  | |  | |  | |
|  | Sp | | 9 | (3.20%) | | | | 5 | | (1.78%) | | 4.98% | |  | |
|  |  | |  |  | | | |  | |  | |  | |  | |
|  | Soc | | 14 | (4.98%) | | | | 6 | | (2.14%) | | 7.12% | |  | |
|  |  | |  |  | | | |  | |  | |  | |  | |
|  | OWB | | 12 | (4.27%) | | | | 1 | | (0.36%) | | 4.63% | |  | |
|  |  | |  |  | | | |  | |  | |  | | | |  |
|  | **Total Constructs** | | **Total Positive** | | | | | **Total Negative** | | | | **Total % of Dimensions** | | | |
|  | 281 | | 143 | (50.89%) | | | | 138 | | (49.11%) | | 100.00% | | | |  |

**Table 2 Legend:** Table 2 represents the prevalence of constructs (or terminology) used within the title and body of each study (n = 25). For continuity the dimensions are ordered alphabetically, as are also represented in Appendix 1. Synthesis of the directional tone - positive or negative – were mapped and analyzed across the seven (7) dimensions of wellness definitions according to best-fit principles. Tabulation according to best-fit and redundancy elimination.
